# Supplementary material for: Investigation of the structural, optical and crystallographic properties of Bi2WO6/Ag plasmonic hybrids and their photocatalytic and electron transfer characteristics
Source: Royal Society of Chemistry journal article supplement (doi:10.1039/c9dt01807g), 2019-01-01
Supplement: c9dt01807g1.pdf [file c9dt01807g1.pdf]

## Supporting Information

### **Investigation of structural, optical and crystallographic properties upon $\text{Bi}_2\text{WO}_6/\text{Ag}$ plasmonic hybrids and its photocatalytic, electron transfer characteristics**

Veerappan Kavinkumar<sup>a</sup>, Atul Verma<sup>b</sup>, Sriramkumar Masilamani<sup>a</sup>, Sanath Kumar<sup>b</sup>, Kandasamy

Jothivenkatachalam<sup>a,\*</sup>, Yen-Pei Fu<sup>b,\*</sup>

<sup>a</sup>Department of Chemistry, Anna University, BIT Campus, Tiruchirappalli, Tamilnadu 620024, India

<sup>b</sup>Department of Materials Science and Engineering, National Dong Hwa University, Shou-Feng, Hualien 97401, Taiwan

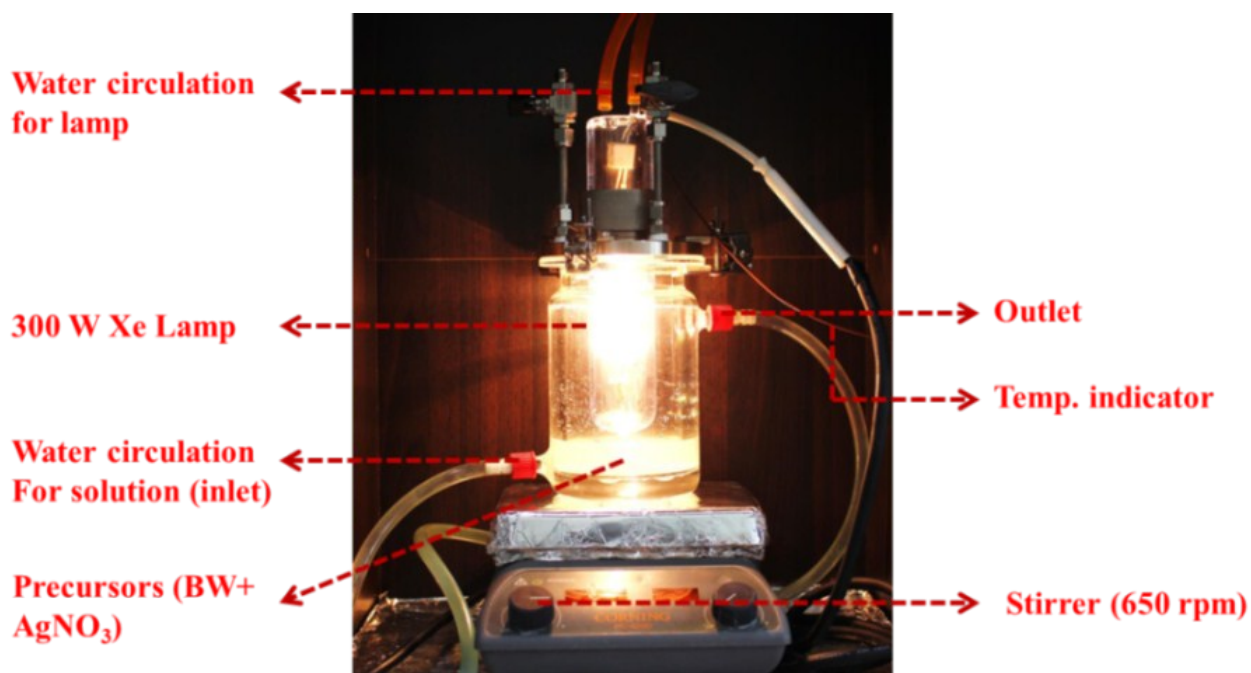

**Fig. S1** Photoreduction setup for the Ag deposition on  $\text{Bi}_2\text{WO}_6$

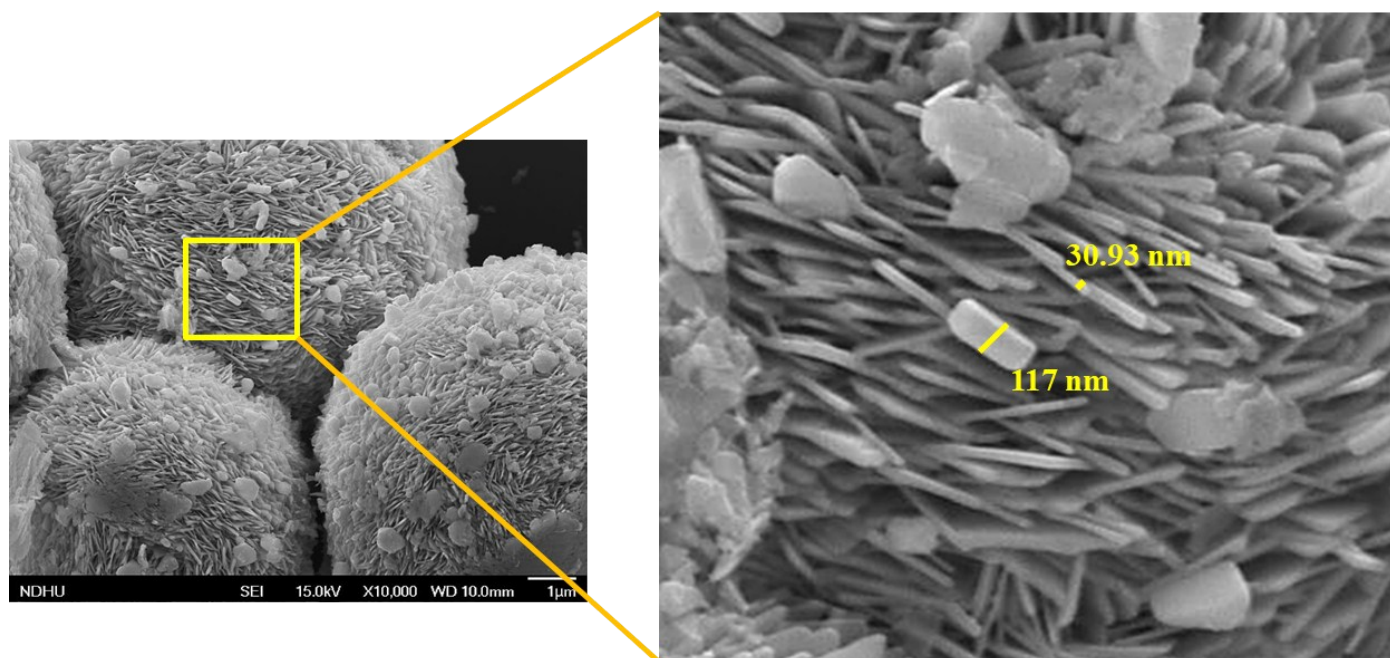

**Fig. S2** FE-SEM image, enlarged view of BW-Ag photocatalyst

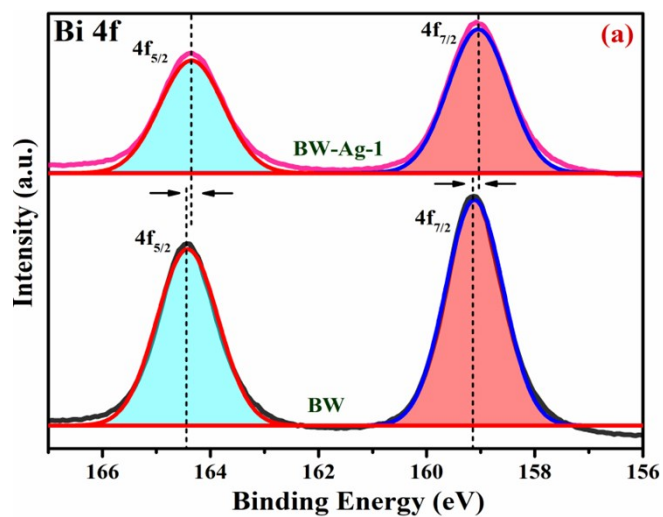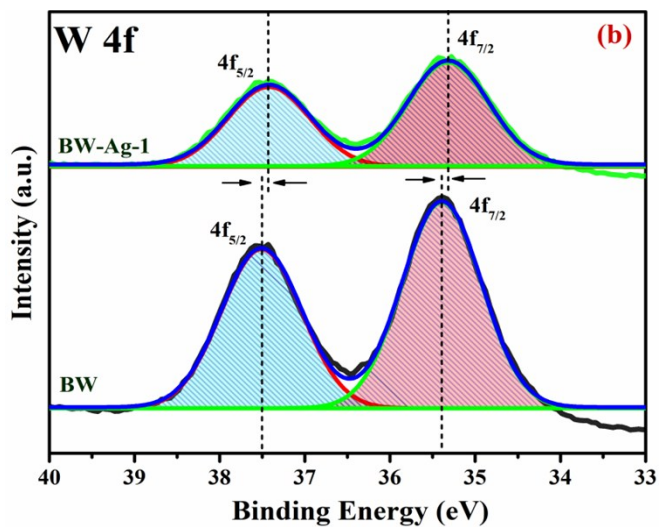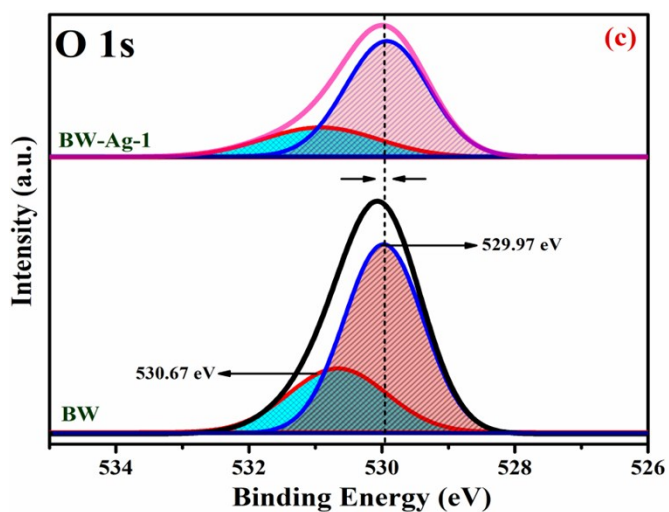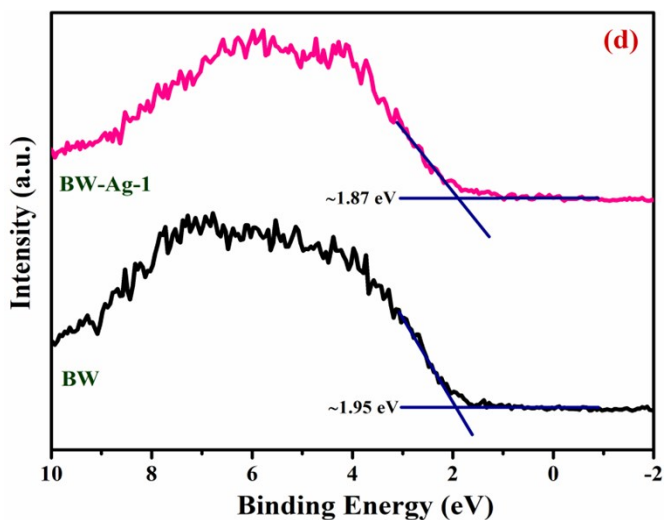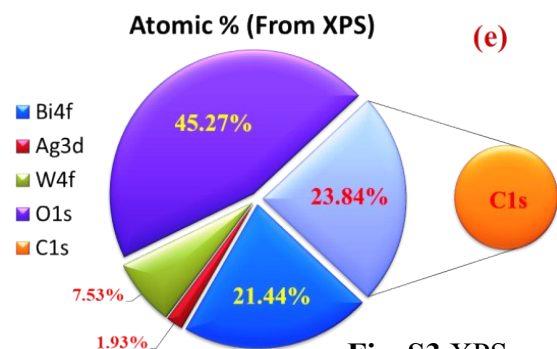

**Fig. S3** XPS spectra of Bi 4f (a), W 4f (b), O 1s (c), valence band spectra (d) and relative atomic percentage (e)

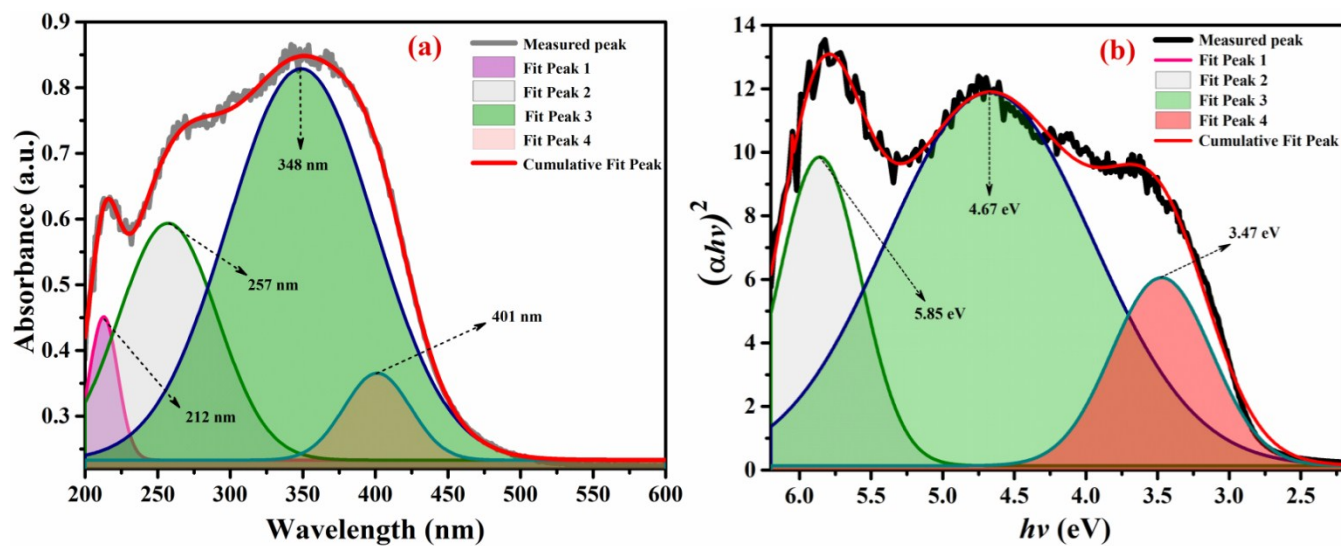

**Fig. S4** Fitted graph of absorbance and Tauc plot of intrinsic BW semiconductor

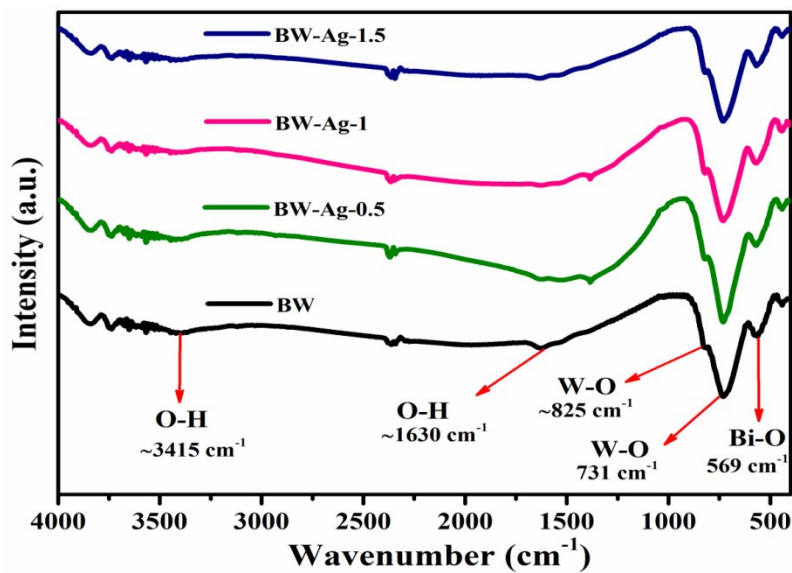

**Fig. S5** FT-IR spectra of all catalysts

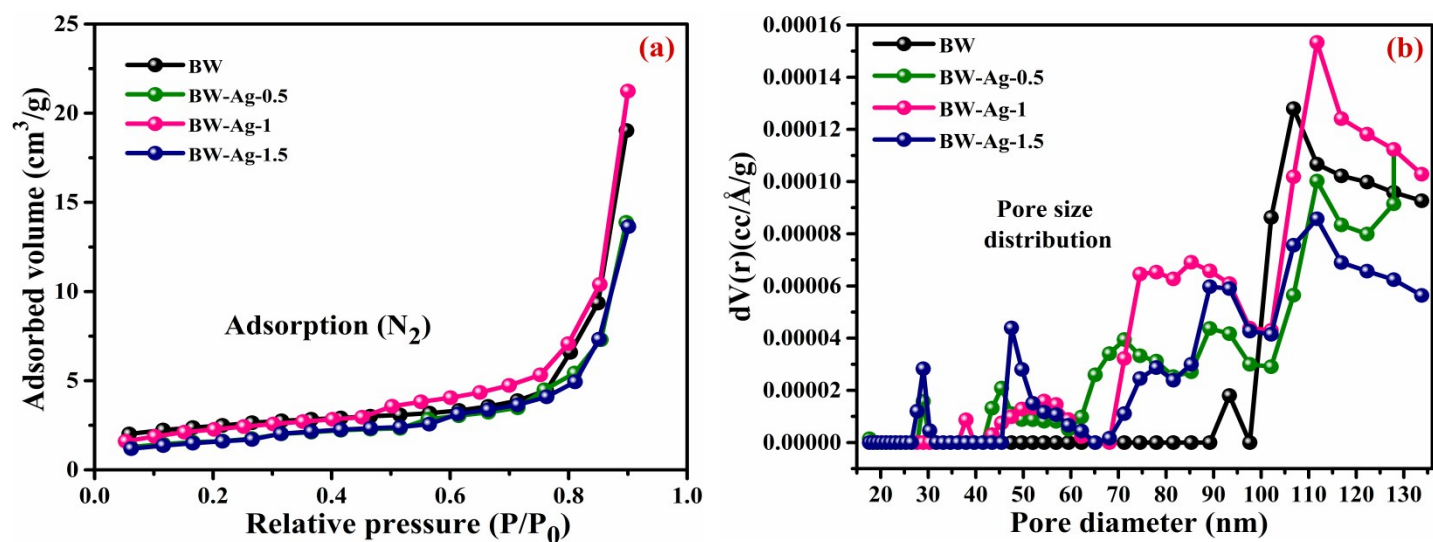

**Figure S6** Surface area and Pore size distribution

| Catalyst  | Band gap ( $E_g$ ) (eV) | Valence band ( $E_{VB}$ ) (eV) | Conduction band ( $E_{CB}$ ) (eV) | Surface Area (m <sup>2</sup> /g) | Pore Volume (cc/g) |
|-----------|-------------------------|--------------------------------|-----------------------------------|----------------------------------|--------------------|
| BW        | 2.78                    | 0.32                           | 3.10                              | 6.456                            | 0.025              |
| BW-Ag-0.5 | 2.60                    | 0.41                           | 3.01                              | 4.515                            | 0.019              |
| BW-Ag-1   | 2.26                    | 0.58                           | 2.84                              | 6.140                            | 0.029              |
| BW-Ag-1.5 | 2.08                    | 0.67                           | 2.75                              | 4.344                            | 0.019              |

**Table S1** Band gap, valence band, conduction band values, surface area and pore size distribution



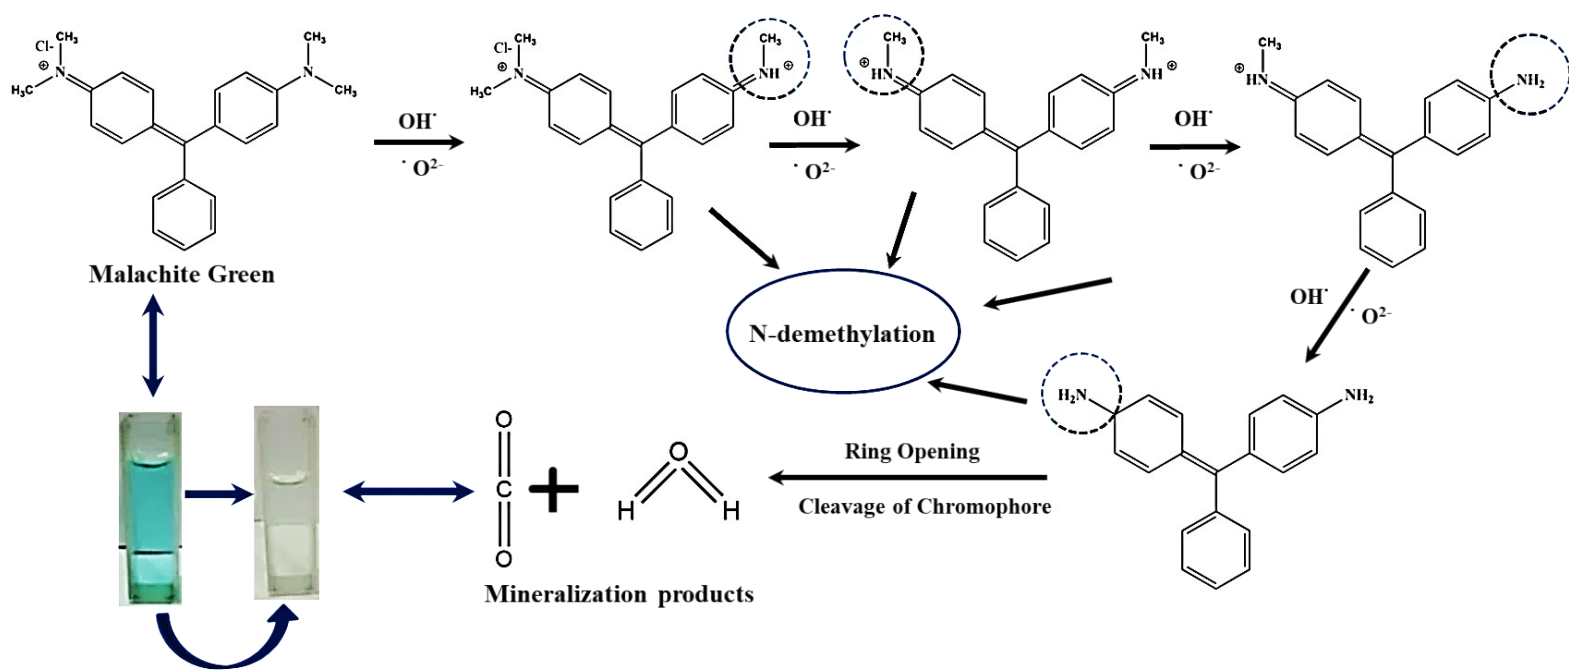

**Fig. S7** Mechanism of Malachite Green dye (MG) fragmentation over the BW-Ag-1 photocatalyst under light illumination.

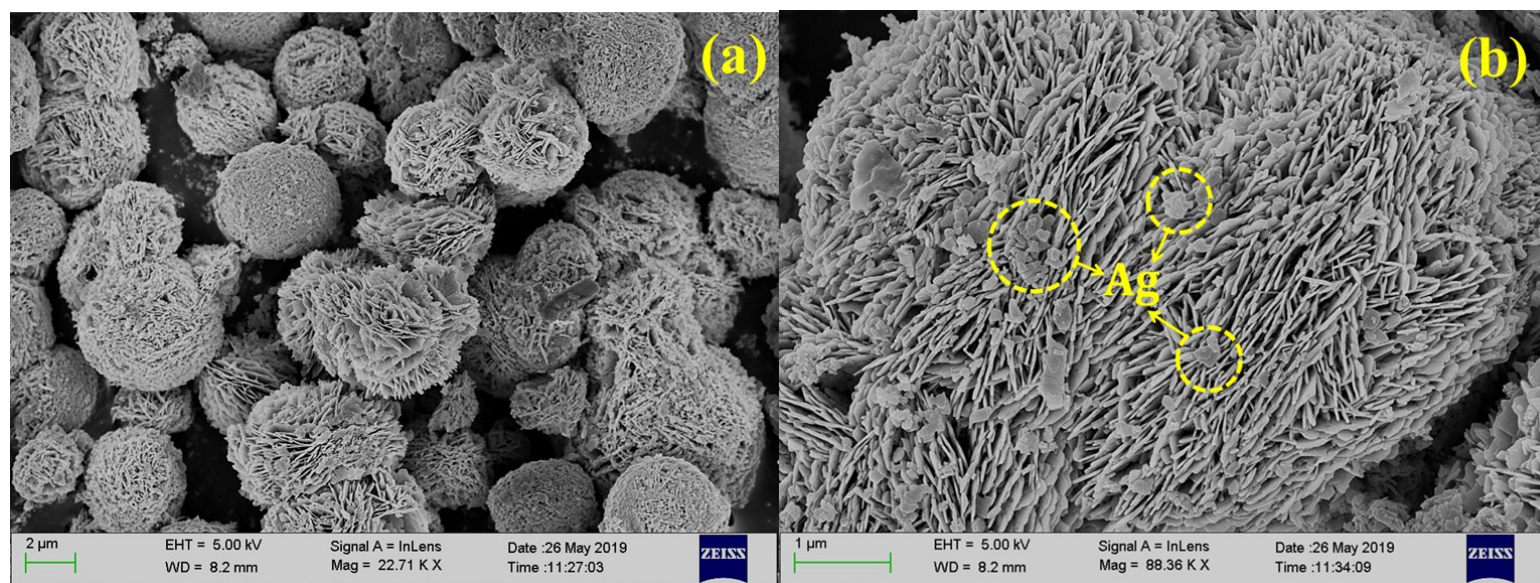

**Fig. S8** a and b shows FE-SEM images of BW-Ag-1 catalyst after five photocatalytic reactions
